# Supplementary material for: Carotenoid biosynthesis genes in rice: structural analysis, genome-wide expression profiling and phylogenetic analysis
Source: Springer Nature journal article supplement (doi:10.1007/s00438-009-0495-x), 2009-11-04
Supplement: MOESM3 [file 438_2009_495_MOESM3_ESM.doc]

Supplemental Table S1. Primer sequences for real-time PCR expression analysis of rice carotenoid biosynthesis genes

| Gene name | Primer sequences (5’ to 3’) |
| --- | --- |
| *OsPSY1* | GAG GCG GGA AGA GGA GAT AAA  GGA AGG CAG ATG CTG TCT GAT T |
| *OsPSY2* | TTC TTT TGA TTT CGC ACG ATT TC  TGG CAG GCT TAT GGC ATA CA |
| *OsPSY3* | GCA GGA TCT ATC TCC CAA TGG A  GGC CGT CGA AGA TGT CAT CT |
| *OsPDS* | TGC CTA TTT TGG TCT TAT CAT ATT TCT GT  TCT TTT TCT CCA GCA TGG CAT A |
| *OsZDS* | GCT GCC CTT TTT GCC TTG A  CAC AAT AAC GAA GAA CAC ACC ATT G |
| *OsCRTISO* | GGA TCT TGC TTC TGC CTG GTA  GCT TCA GCT TTT CAG GGA TCA |
| *OsβLCY* | GGT GCC TCG TCC AGT ACG A  CCA TGA ACA GCA TCT TGT CGA T |
| *OsєLCY* | TGC ATG AAT TTG GCA AAT GG  CCA GCA CAC GCA TCA CGT AT |
| *OsβOH1* | TCA GTG GCA ATT GTA GCC TTG TAA  CCA AAT GAG CTT CCA AAT ATC TAT CTA A |
| *OsβOH2* | TGG CCT GTG GCA TGC AT  AAG AAT AAC CAT CCC ACA GAA CAT C |
| *OsβOH3* | GCA CAT GCC ATG AGA GCT ACT ACT A  CAT AAA ATC AGG AAA AGC CAA AAC A |
| *OsєOH1* | CAT CTG TGC GTG CCT CTT TG  AAG TAA CAA CTC AGC ACA ATT TCC A |
| *OsєOH2* | GCC GCT GGA AAA CAG ATA GC  CAC AGC ATC GAA GCA TCC AA |
| *OsєOH3* | CCG TTT CAA GCC CAA ATT TTA C  CCA CTG AAA GAG GAA AAT GAT AGT ATG T |
| *OsZE* | GCA CTA AAA TGC AGG TTC CAC TT  ATG GAG AAC TGC AAT TTC AAT CC |
| *OsVDE* | CAA CTG TTC CAA ATA TGA TAT GGA TTA TGT  TGC CAT AAA GTA CCG AAG AAA ATT AA |
